# Supplementary material
Source: PubMed Central journal article supplement (PMC4787694)
Supplement: gilm689240.w1_default.pdf [file gilm689240.w1_default.pdf]

## Web extra 1: Description of the Sheffield type 2 diabetes model

The Sheffield diabetes model is an integrated health state simulation model of the natural history of diabetes and the lifetime cost effectiveness of different treatments for type 2 diabetes. It was constructed using Excel for Windows 2003 spreadsheet package, with programming in visual basic for applications. The model is at the patient level and replicates patients' risk of progression through five co-morbidities: retinopathy, nephropathy, neuropathy, coronary heart disease, and cerebrovascular disease. The intensity of management and monitoring can be varied by altering targets such as those for glycaemic control, requirement for insulin, blood pressure control, and intensity of lipid-lowering therapy. For microvascular complications, the model is largely based on the Eastman models,<sup>1 2</sup> using results from the Diabetes Control and Complications Trial (DCCT). For macrovascular complications, the model uses equations from the United Kingdom Prospective Diabetes Study (UKPDS).<sup>3 4 5</sup>

The time spent by patients in each state for each comorbidity is recorded—for example, years spent on dialysis, severe vision loss—together with transitions between states. The effects of treatments on complications are modelled either via a relative risk (for example, for the effect of photocoagulation on risk of severe vision loss) or via the effect on underlying risk factors (for example, the effect of antiglycaemic medication on HbA<sub>1c</sub>). Complications are driven by individual demographic and modifiable characteristics at each time period, and the model includes diabetes and other- cause mortality.

Total costs are obtained by adding the costs of therapy, the costs of one off treatments (for example, cost of amputation), and the cost of ongoing treatment of complications (for example, treatment following stroke). The health benefit, the incremental quality adjusted life years, is obtained by applying quality of life measures to the time spent in the various diabetic health states. Cost effectiveness estimates for potential interventions are obtained by dividing the total costs by the incremental quality adjusted life years.

The model structure is shown in web figure A. More details of the model are available in an economic evaluation of screening for type 2 diabetes.<sup>6</sup>

### References

- 1 Eastman RC, Javitt JC, Herman WH, Dasbach EJ, Zbrozek AS, Dong F, et al. Model of complications of NIDDM. I. Model construction and assumptions. *Diabetes Care* 1997;20:725-34.
- 2 Eastman RC, Javitt JC, Herman WH, Dasbach EJ, Copley-Merriman C, Maier W, et al. Model of complications of NIDDM. II. Analysis of the health benefits and cost-effectiveness of treating NIDDM with the goal of normoglycemia. *Diabetes Care* 1997;20:735-44.
- 3 Stevens RJ, Kothari V, Adler AI, Stratton IM; United Kingdom Prospective Diabetes Study (UKPDS) Group. The UKPDS risk engine: a model for the risk of coronary heart disease in type 2 diabetes (UKPDS 56). *Clin Sci* 2001;101:671-9.
- 4 Kothari V, Stevens RJ, Adler AI, Stratton IM, Manley SE, Neil HAW, et al. UKPDS 60: risk of stroke in type 2 diabetes estimated by the UK Prospective Diabetes Study risk engine. *Stroke* 2002;33:1776-81.
- 5 Stevens RJ, Coleman RL, Adler AI, Stratton IM, Matthews DR, Holman RR. Risk factors for myocardial infarction case fatality and stroke case fatality in type 2 diabetes: UKPDS 66. *Diabetes Care* 2004;27:201-7.
- 6 Waugh N, Scotland G, McNamee P, Gillett M, Brennan A, Goyder E, et al. Screening for type 2 diabetes: literature review and economic modelling. *Health Technol Assess* 2007;11:1-125.
