# Supplementary material
Source: PubMed Central journal article supplement (PMC4787694)
Supplement: gilm689240.wf1_default.pdf [file gilm689240.wf1_default.pdf]

## Long-term Disease State Progression Model

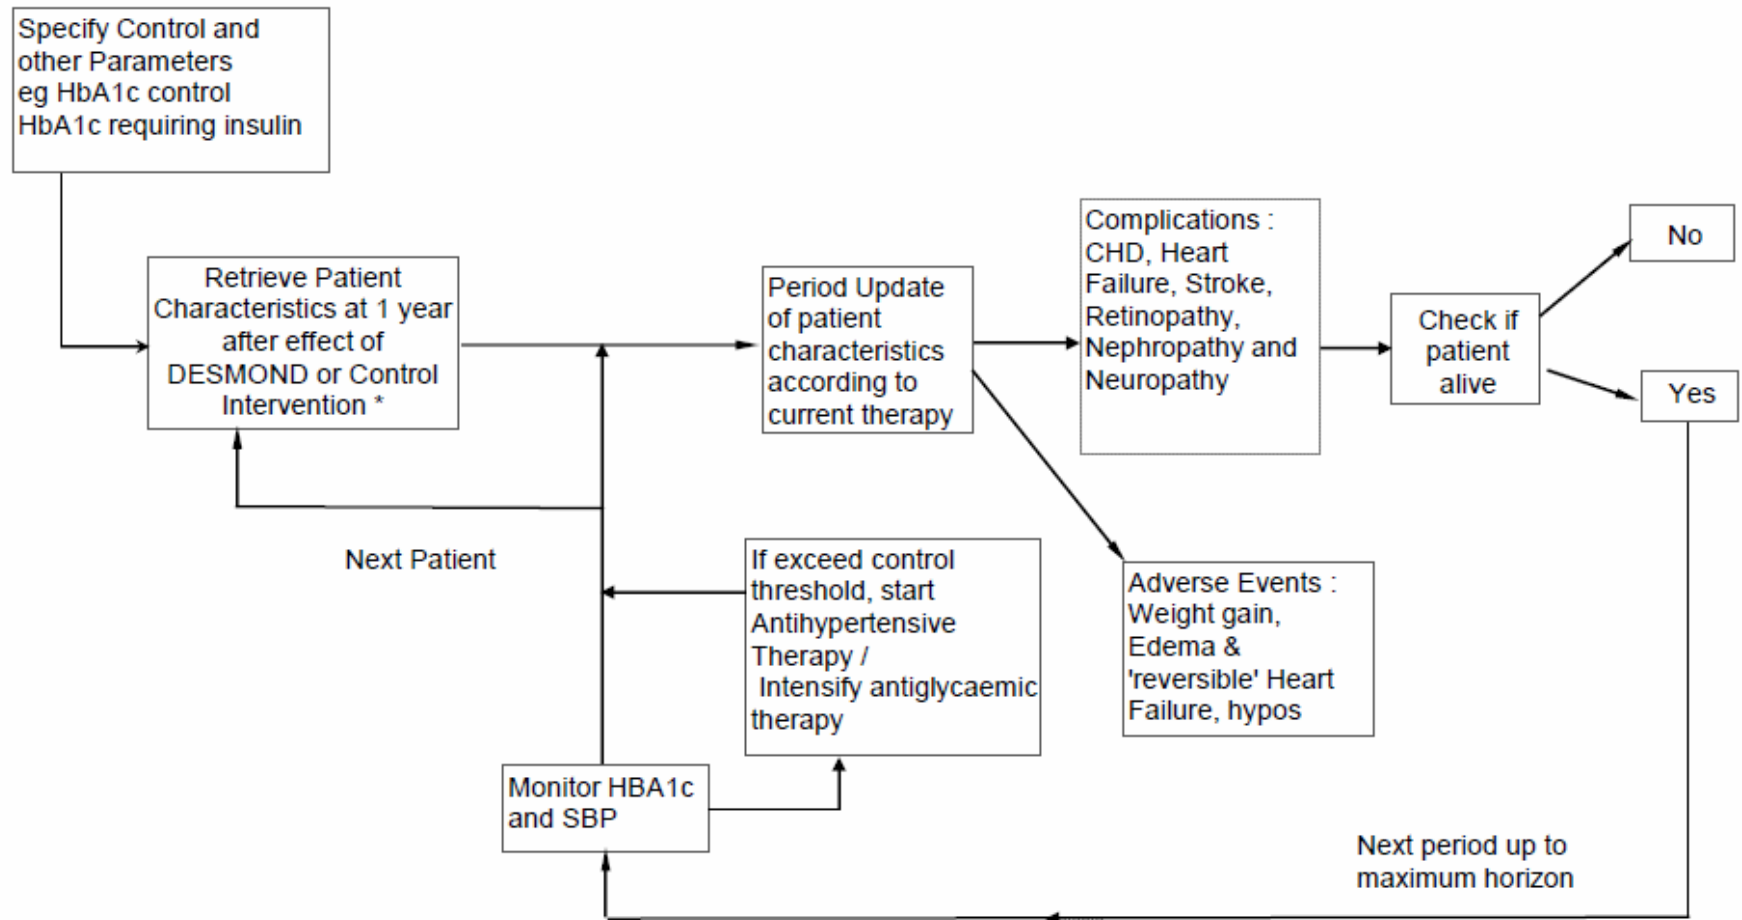

\* Age, Gender, Smoking / former , smoker, HbA1c, SBP, Total Cholesterol, HDL, Ethnicity, Atrial fibrillation
